# Supplementary material
Source: PubMed Central journal article supplement (PMC3051344)
Supplement: NIHMS266289-supplement-1.pdf [file NIHMS266289-supplement-1.pdf]

## SUPPLEMENTARY MATERIAL

Title: COLLATERAL FLOW PREDICTS RESPONSE TO ENDOVASCULAR THERAPY FOR ACUTE ISCHEMIC STROKE

The UCLA-SAMSUNG Stroke collaborators

| Case Number | Center | Mode of endovascular therapy                                   | of IV thrombolysis prior to endovascular therapy | NIHSS score on admission | TIMI score | Pretreatment collaterals | Site of occlusion                                                                      | T zone occlusion        | Gender              | Age      | Atrial fibrillation      |
|-------------|--------|----------------------------------------------------------------|--------------------------------------------------|--------------------------|------------|--------------------------|----------------------------------------------------------------------------------------|-------------------------|---------------------|----------|--------------------------|
|             |        | 1=IA fibrinolytics,<br>2=Mechanical,<br>3=Merci,<br>4=Combined | = IV tPA, 0=not use                              | Score                    | scale      | scale                    | 1=carotid bifurcation,<br>2=distal ICA, 3=proximal M1,<br>4=distal M1,<br>5=distal MCA | 1=present,<br>0=absence | 1=male,<br>2=female | year-old | 1=presence,<br>0=absence |
| 1           | UCLA   | 3                                                              | 0                                                | 17                       | 3          | 3                        | 5                                                                                      | 0                       | 2                   | 72       | 1                        |
| 2           | UCLA   | 3                                                              | 1                                                | 18                       | 2          | 4                        |                                                                                        | 0                       | 2                   | 76       | 1                        |
| 3           | UCLA   | 3                                                              | 0                                                | 18                       | 2          | 1                        | 4                                                                                      | 0                       | 1                   | 57       | 0                        |
| 4           | UCLA   | 4                                                              | 1                                                | 14                       | 2          | 4                        | 3                                                                                      | 0                       | 2                   | 86       | 1                        |
| 5           | UCLA   | 3                                                              | 0                                                | 15                       | 2          | 1                        | 2                                                                                      | 1                       | 2                   | 53       | 0                        |
| 6           | UCLA   | 3                                                              | 0                                                | 19                       | 1          | 1                        | 2                                                                                      | 1                       | 1                   | 85       | 0                        |
| 7           | UCLA   | 1                                                              | 1                                                | 28                       | 2          | 2                        | 4                                                                                      | 0                       | 1                   | 72       | 1                        |
| 8           | UCLA   | 4                                                              | 0                                                | 36                       | 3          | 4                        | 2                                                                                      | 1                       | 1                   | 79       | 1                        |
| 9           | UCLA   | 3                                                              | 0                                                | 24                       | 2          | 0                        |                                                                                        | 0                       | 2                   | 87       | 1                        |
| 10          | UCLA   |                                                                | 1                                                | 8                        | 0          | 3                        | 4                                                                                      | 0                       | 2                   | 24       | 0                        |
| 11          | UCLA   | 4                                                              | 0                                                | 20                       | 2          | 2                        | 3                                                                                      | 0                       | 1                   | 77       | 0                        |
| 12          | UCLA   | 1                                                              | 0                                                | 7                        | 0          | 1                        | 5                                                                                      | 0                       | 1                   | 64       | 0                        |
| 13          | UCLA   | 3                                                              | 0                                                | 10                       | 2          | 4                        |                                                                                        | 0                       | 1                   | 62       | 1                        |
| 14          | UCLA   | 1                                                              | 0                                                | 24                       | 3          | 3                        | 1                                                                                      | 0                       | 1                   | 90       | 0                        |
| 15          | UCLA   | 3                                                              | 0                                                | 14                       | 0          | 3                        |                                                                                        | 0                       | 2                   | 73       | 0                        |
| 16          | UCLA   | 3                                                              | 0                                                | 23                       | 0          | 3                        | 4                                                                                      | 0                       | 2                   | 60       | 0                        |
| 17          | UCLA   | 1                                                              | 0                                                | 4                        | 2          | 3                        |                                                                                        | 0                       | 1                   | 88       | 1                        |
| 18          | UCLA   | 1                                                              | 0                                                | 5                        | 2          | 2                        | 4                                                                                      | 0                       | 1                   | 59       | 0                        |
| 19          | UCLA   | 1                                                              | 0                                                | 16                       | 2          | 1                        | 1                                                                                      | 0                       | 1                   | 53       | 0                        |
| 20          | UCLA   | 4                                                              | 0                                                | 19                       | 1          | 3                        | 3                                                                                      | 0                       | 2                   | 59       | 0                        |
| 21          | UCLA   | 4                                                              | 0                                                | 19                       | 1          | 2                        | 4                                                                                      | 0                       | 1                   | 76       | 1                        |
| 22          | UCLA   | 1                                                              | 0                                                | 28                       | 1          | 2                        |                                                                                        | 0                       | 2                   | 77       | 1                        |
| 23          | UCLA   | 1                                                              | 0                                                | 17                       | 2          | 1                        |                                                                                        | 0                       | 1                   | 81       | 1                        |
| 24          | UCLA   | 4                                                              | 0                                                | 6                        | 1          | 2                        | 2                                                                                      | 1                       | 2                   | 55       | 0                        |
| 25          | UCLA   | 1                                                              | 0                                                | 7                        | 2          | 2                        | 4                                                                                      | 0                       | 2                   | 79       | 0                        |
| 26          | UCLA   | 3                                                              | 0                                                | 10                       | 2          | 4                        | 4                                                                                      | 0                       | 2                   | 45       | 1                        |
| 27          | UCLA   | 1                                                              | 0                                                | 20                       | 0          | 3                        |                                                                                        | 0                       | 1                   | 88       | 0                        |

|    |      |   |   |    |   |   |   |   |   |    |   |
|----|------|---|---|----|---|---|---|---|---|----|---|
| 28 | UCLA | 3 | 0 | 11 | 2 | 4 | 4 | 0 | 1 | 78 | 0 |
| 29 | UCLA | 4 | 0 | 15 | 1 | 2 |   | 0 | 1 | 40 | 1 |
| 30 | UCLA | 3 | 0 | 23 | 0 | 4 |   | 0 | 1 | 84 | 0 |
| 31 | UCLA | 1 | 0 | 16 | 2 | 1 | 3 | 0 | 1 | 76 | 1 |
| 32 | UCLA | 3 | 0 | 19 | 2 | 2 | 2 | 1 | 2 | 93 | 1 |
| 33 | UCLA | 3 | 0 | 25 | 0 | 2 | 2 | 1 | 1 | 71 | 0 |
| 34 | UCLA | 3 | 0 | 26 | 0 | 0 |   | 0 | 1 | 74 | 0 |
| 35 | UCLA | 3 | 1 | 24 | 3 | 4 | 2 | 1 | 2 | 83 | 0 |
| 36 | UCLA | 3 | 0 | 25 | 0 | 1 | 4 | 0 | 2 | 84 | 1 |
| 37 | UCLA | 4 | 0 | 13 | 2 | 4 |   | 0 | 2 | 73 | 1 |
| 38 | UCLA | 4 | 0 | 15 | 2 | 2 |   | 0 | 2 | 86 | . |
| 39 | UCLA | 1 | 0 | 23 | 2 | 2 |   | 0 | 1 | 85 | 1 |
| 40 | UCLA | 1 | 0 | 15 | 3 | 4 | 3 | 0 | 1 | 69 | 0 |
| 41 | UCLA | 3 | 0 | 27 | 3 | 3 |   | 0 | 1 | 89 | 1 |
| 42 | UCLA | 1 | 0 | 20 | 2 | 3 |   | 0 | 2 | 84 | 1 |
| 43 | UCLA | 3 | 0 | 13 | 2 | 1 |   | 0 | 2 | 68 | 1 |
| 44 | UCLA | 3 | 0 | 11 | 3 | 4 | 3 | 0 | 1 | 14 | 0 |
| 45 | UCLA | 1 | 1 | 16 | 3 | 3 |   | 0 | 1 | 65 | 1 |
| 46 | UCLA | 3 | 0 | 13 | 1 | 4 | 3 | 0 | 2 | 36 | 0 |
| 47 | UCLA | 3 | 0 | 18 | 2 | 3 |   | 0 | 1 | 58 | 0 |
| 48 | UCLA | 3 | 0 | 22 | 3 | 4 | 3 | 0 | 2 | 88 | 0 |
| 49 | UCLA | 3 | 0 | 17 | 1 | 2 | 2 | 1 | 1 | 73 | 0 |
| 50 | UCLA | 3 | 0 | 19 | 2 | 1 |   | 0 | 1 | 73 | 0 |
| 51 | UCLA | 3 | 0 | 22 | 2 | 3 |   | 0 | 2 | 87 | 0 |
| 52 | UCLA | 3 | 0 | 13 | 2 | 3 |   | 0 | 1 | 60 | 0 |
| 53 | UCLA | 3 | 0 | 21 | 0 | 2 | 3 | 0 | 1 | 34 | 0 |
| 54 | UCLA | 3 | 0 | 22 | 2 | 1 |   | 0 | 1 | 73 | 0 |
| 55 | UCLA | 1 | 0 | 9  | 2 | 3 |   | 0 | 2 | 58 | 0 |
| 56 | UCLA | 3 | 1 | 25 | 2 | 2 |   | 0 | 1 | 84 | 1 |
| 57 | UCLA |   | 1 | 11 | 0 | 1 | 5 | 0 | 2 | 59 | 0 |
| 58 | UCLA | 3 | 1 | 17 | 3 | 3 |   | 0 | 2 | 33 | 0 |
| 59 | UCLA | 1 | 0 | 14 | 2 | 3 | 5 | 0 | 1 | 33 | 0 |
| 60 | UCLA | 3 | 1 | 25 | 0 | 2 |   | 0 | 1 | 84 | 1 |
| 61 | UCLA | 1 | 0 | 20 | 3 | 0 |   | 0 | 2 | 85 | 1 |
| 62 | UCLA | 1 | 0 | 29 | 3 | 2 |   | 0 | 1 | 70 | 0 |
| 63 | UCLA | 3 | 0 | 18 | 3 | 2 |   | 0 | 2 | 40 | 0 |

|    |      |   |   |    |   |   |   |   |   |    |   |
|----|------|---|---|----|---|---|---|---|---|----|---|
| 64 | UCLA | 1 | 1 | 10 | 3 | 2 | 5 | 0 | 1 | 53 | 0 |
| 65 | UCLA | 3 | 0 | 18 | 3 | 4 | 4 | 0 | 1 | 40 | 0 |
| 66 | UCLA | 4 | 0 | 27 | 2 | 4 |   | 0 | 1 | 68 | 0 |
| 67 | UCLA | 4 | 0 | 25 | 1 | 1 |   | 0 | 1 | 65 | 1 |
| 68 | UCLA | 3 | 0 | 24 | 2 | 1 |   | 0 | 2 | 55 | 0 |
| 69 | UCLA | 4 | 0 | 15 | 2 | 1 |   | 0 | 2 | 67 | 1 |
| 70 | UCLA |   | 1 | 13 | 2 | 4 | 3 | 0 | 2 | 23 | 0 |
| 71 | UCLA | 3 | 0 | 21 | 1 | 0 | 2 | 1 | 1 | 61 | 1 |
| 72 | UCLA | 1 | 0 | 6  | 0 | 4 | 5 | 0 | 2 | 82 | 0 |
| 73 | UCLA | 3 | 1 | 27 | 3 | 4 | 2 | 1 | 1 | 41 | 0 |
| 74 | UCLA | 3 | 0 | 23 | 2 | 1 | 3 | 0 | 1 | 64 | 1 |
| 75 | UCLA | 3 | 0 | 18 | 3 | 2 | 2 | 1 | 2 | 76 | 1 |
| 76 | UCLA | 2 | 1 | 10 | 3 | 4 | 3 | 0 | 1 | 66 | 0 |
| 77 | UCLA | 3 | 1 | 21 | 3 | 3 | 4 | 0 | 2 | 88 | 1 |
| 78 | UCLA | 3 | 0 | 14 | 3 | 4 | 4 | 0 | 2 | 89 | 0 |
| 79 | UCLA | 3 | 0 | 22 | 2 | 4 | 3 | 0 | 2 | 95 | 0 |
| 80 | UCLA | 3 | 0 | 8  | 3 | 4 | 3 | 0 | 2 | 95 | 1 |
| 81 | UCLA | 3 | 0 | 19 | 2 | 3 | 2 | 1 | 2 | 47 | 1 |
| 82 | UCLA | 1 | 1 | 6  | 2 | 1 | 3 | 0 | 1 | 57 | 1 |
| 83 | UCLA | 4 | 1 | 14 | 3 | 2 | 4 | 0 | 1 | 86 | 0 |
| 84 | UCLA | 3 | 1 | 20 | 2 | 2 | 3 | 0 | 2 | 82 | 1 |
| 85 | UCLA | 3 | 0 | 22 | 0 | 0 | 4 | 0 | 2 | 71 | 0 |
| 86 | UCLA | 3 | 0 | 21 | 2 | 2 | 2 | 1 | 2 | 51 | 1 |
| 87 | UCLA | 3 | 1 | 17 | 2 | 2 | 4 | 0 | 1 | 71 | 0 |
| 88 | UCLA | 3 | 0 | 16 | 0 | 1 | 3 | 0 | 2 | 83 | 1 |
| 89 | UCLA | 3 | 0 | 21 | 3 | 3 | 3 | 0 | 2 | 77 | 1 |
| 90 | UCLA | 3 | 0 | 18 | 2 | 4 | 3 | 0 | 2 | 26 | 0 |
| 91 | UCLA | 3 | 1 | 18 | 0 | 4 | 3 | 0 | 2 | 83 | 1 |
| 92 | UCLA | 3 | 0 | 23 | 2 | 3 | 3 | 0 | 2 | 84 | 1 |
| 93 | UCLA | 3 | 1 | 8  | 1 | 4 | 3 | 0 | 2 | 46 | 0 |
| 94 | UCLA | 3 | 0 | 6  | 1 | 3 | 5 | 0 | 1 | 81 | 0 |
| 95 | UCLA | 3 | 0 | 10 | 1 | 1 | 3 | 0 | 2 | 61 | 0 |
| 96 | UCLA | 3 | 0 | 38 | 2 | 2 | 4 | 0 | 1 | 65 | 1 |
| 97 | UCLA | 3 | 0 | 25 | 2 | 1 | 1 | 0 | 1 | 68 | 0 |
| 98 | UCLA |   | 0 | 8  | 1 | 3 | 3 | 0 | 2 | 56 | 0 |
| 99 | UCLA | 3 | 0 | 9  | 2 | 2 | 4 | 0 | 1 | 29 | 0 |

|     |      |   |   |    |   |   |   |   |   |    |   |
|-----|------|---|---|----|---|---|---|---|---|----|---|
| 100 | UCLA | 1 | 0 | 22 | 2 | 2 | 5 | 0 | 1 | 54 | 0 |
| 101 | UCLA | 3 | 0 | 23 | 2 | 1 | 3 | 0 | 2 | 83 | 1 |
| 102 | UCLA | 3 | 1 | 12 | 0 | 2 | 3 | 0 | 2 | 39 | 0 |
| 103 | UCLA | 2 | 0 | 22 | 3 | 1 | 1 | 0 | 1 | 55 | 0 |
| 104 | UCLA |   | 0 | 24 | 0 | 1 | 1 | 0 | 1 | 58 | 0 |
| 105 | UCLA | 3 | 1 | 18 | 2 | 2 | 3 | 0 | 2 | 61 | 1 |
| 106 | UCLA | 3 | 0 | 12 | 2 | 2 | 4 | 0 | 1 | 44 | 0 |
| 107 | UCLA | 3 | 0 | 23 | 2 | 1 | 2 | 0 | 2 | 95 | 0 |
| 108 | UCLA | 2 | 0 | 22 | 3 | 1 | 2 | 1 | 1 | 62 | 0 |
| 109 | UCLA | 3 | 0 | 20 | 2 | 1 | 3 | 0 | 2 | 50 | 0 |
| 110 | UCLA | 2 | 0 | 10 | 0 | 2 | 3 | 0 | 2 | 86 | 1 |
| 111 | UCLA |   | 0 | 5  | 1 | 2 | 4 | 0 | 1 | 78 | 1 |
| 112 | UCLA | 2 | 0 | 18 | 0 | 1 | 1 | 0 | 2 | 74 | 0 |
| 113 | UCLA | 3 | 0 | 20 | 0 | 1 | 1 | 0 | 2 | 53 | 0 |
| 114 | UCLA | 3 | 0 | 35 | 3 | 0 | 2 | 1 | 1 | 56 | 0 |
| 115 | UCLA |   | 0 | 14 | 3 | 3 | 5 | 0 | 2 | 67 | 0 |
| 116 | UCLA | 3 | 0 | 18 | 3 | 3 | 2 | 1 | 1 | 62 | 1 |
| 117 | UCLA | 3 | 0 | 26 | 1 | 2 |   | 0 | 2 | 73 | . |
| 118 | UCLA | 3 | 0 | 25 | 1 | 1 |   | 0 | 2 | 64 | 0 |
| 119 | UCLA | 4 | 0 | 15 | 2 | 3 |   | 0 | 1 | 53 | . |
| 120 | UCLA | 3 | 0 | 24 | 1 | 0 |   | 0 | 1 | 64 | . |
| 121 | UCLA | 4 | 0 | 13 | 3 | 4 |   | 0 | 1 | 46 | . |
| 122 | UCLA | 3 | 0 | 19 | 2 | 0 | 1 | 0 | 2 | 79 | 1 |
| 123 | UCLA | 3 | 0 | 26 | 2 | 1 |   | 0 | 1 | 44 | 0 |
| 124 | UCLA | 3 | 0 | 10 | 2 | 3 | 3 | 0 | 2 | 68 | . |
| 125 | UCLA | 3 | 0 | 31 | 1 | 4 |   | 0 | 1 | 61 | . |
| 126 | UCLA | 3 | 0 | 17 | 1 | 1 |   | 0 | 1 | 59 | 1 |
| 127 | UCLA | 3 | 0 | 17 | 3 | 2 | 2 | 1 | 1 | 86 | 1 |
| 128 | UCLA | 3 | 0 | 25 | 2 | 4 |   | 0 | 1 | 71 | . |
| 129 | UCLA |   | 0 | 3  | 1 | 3 | 5 | 0 | 1 | 60 | 0 |
| 130 | UCLA |   | 0 | 4  | 0 | 3 | 1 | 0 | 1 | 72 | 0 |
| 131 | UCLA | 1 | 1 | 21 | 0 | 1 | 2 | 1 | 2 | 86 | 1 |
| 132 | UCLA |   | 0 | 18 | 1 | 1 | 1 | 0 | 1 | 57 | 0 |
| 133 | UCLA | 3 | 1 | 26 | 0 | 1 | 4 | 0 | 1 | 93 | 1 |
| 134 | UCLA | 1 | 1 | 24 | 2 | 4 | 1 | 0 | 2 | 51 | 0 |
| 135 | UCLA | 1 | 1 | 23 | 1 | 1 | 3 | 0 | 1 | 73 | 1 |

|     |      |   |   |    |   |   |   |   |   |    |   |
|-----|------|---|---|----|---|---|---|---|---|----|---|
| 136 | UCLA |   | 0 | 5  | 2 | 3 | 3 | 0 | 2 | 30 | 0 |
| 137 | UCLA |   | 0 | 19 | 1 | 2 | 5 | 0 | 1 | 22 | 0 |
| 138 | UCLA | 2 | 0 | 13 | 3 | 4 | 2 | 1 | 1 | 48 | 0 |
| 139 | SMC  |   | 0 | 11 | 0 | 2 | 3 | 0 | 2 | 51 | 0 |
| 140 | SMC  | 1 | 1 | 22 | 0 | 1 | 2 | 1 | 1 | 55 | 1 |
| 141 | SMC  | 2 | 1 | 7  | 3 | 1 | 5 | 0 | 2 | 74 | 1 |
| 142 | SMC  | 4 | 0 | 15 | 3 | 3 | 3 | 0 | 2 | 71 | 1 |
| 143 | SMC  | 4 | 0 | 16 | 0 | 3 | 3 | 0 | 2 | 59 | 0 |
| 144 | SMC  | 4 | 1 | 8  | 3 | 2 | 2 | 1 | 2 | 43 | 0 |
| 145 | SMC  | 1 | 1 | 10 | 1 | 0 | 3 | 0 | 2 | 53 | 0 |
| 146 | SMC  | 1 | 1 | 17 | 2 | 1 | 3 | 0 | 2 | 65 | 1 |
| 147 | SMC  | 4 | 1 | 20 | 2 | 0 | 4 | 0 | 1 | 56 | 1 |
| 148 | SMC  | 4 | 1 | 8  | 1 | 3 | 5 | 1 | 2 | 85 | 1 |
| 149 | SMC  | 4 | 0 | 13 | 1 | 1 | 5 | 0 | 1 | 65 | 0 |
| 150 | SMC  | 4 | 0 | 7  | 2 | 3 | 3 | 0 | 2 | 52 | 1 |
| 151 | SMC  | 1 | 0 | 7  | 1 | 4 | 3 | 0 | 2 | 34 | 0 |
| 152 | SMC  | 4 | 1 | 20 | 2 | 1 | 5 | 0 | 2 | 77 | 1 |
| 153 | SMC  | 1 | 0 | 11 | 3 | 3 | 4 | 0 | 1 | 53 | 0 |
| 154 | SMC  | 1 | 1 | 9  | 0 | 3 | 3 | 0 | 1 | 44 | 0 |
| 155 | SMC  | 1 | 1 | 9  | 3 | 4 | 3 | 0 | 1 | 59 | 0 |
| 156 | SMC  | 4 | 0 | 10 | 3 | 3 | 3 | 0 | 2 | 70 | 0 |
| 157 | SMC  | 4 | 1 | 23 | 0 | 0 | 2 | 1 | 2 | 64 | 1 |
| 158 | SMC  | 1 | 1 | 15 | 2 | 4 | 1 | 0 | 1 | 72 | 0 |
| 159 | SMC  |   | 1 | 14 | 0 | 0 | 5 | 0 | 1 | 61 | 0 |
| 160 | SMC  | 4 | 1 | 11 | 2 | 4 | 3 | 0 | 1 | 79 | 0 |
| 161 | SMC  | 4 | 0 | 7  | 2 | 4 | 5 | 0 | 1 | 62 | 0 |
| 162 | SMC  | 2 | 1 | 14 | 2 | 0 | 3 | 0 | 2 | 45 | 1 |
| 163 | SMC  | 4 | 0 | 8  | 0 | 2 | 2 | 1 | 2 | 47 | 0 |
| 164 | SMC  | 1 | 0 |    | 0 | 2 | 2 | 1 | 2 | 82 | 0 |
| 165 | SMC  | 4 | 1 | 18 | 1 | 1 | 5 | 0 | 1 | 58 | 1 |
| 166 | SMC  | 2 | 0 | 12 | 1 | 1 | 3 | 0 | 1 | 63 | 0 |
| 167 | SMC  | 2 | 0 | 6  | 1 | 2 | 1 | 0 | 1 | 70 | 0 |
| 168 | SMC  | 2 | 0 | 21 | 0 | 1 | 5 | 0 | 1 | 79 | 1 |
| 169 | SMC  | 4 | 0 | 16 | 2 | 2 | 3 | 0 | 2 | 52 | 0 |
| 170 | SMC  | 4 | 0 | 12 | 2 | 2 | 3 | 0 | 1 | 52 | 0 |
| 171 | SMC  | 4 | 0 | 9  | 3 | 3 | 5 | 0 | 2 | 81 | 0 |

|     |     |   |   |    |   |   |   |   |   |    |   |
|-----|-----|---|---|----|---|---|---|---|---|----|---|
| 172 | SMC | 2 | 1 | 13 | 1 | 2 | 2 | 1 | 2 | 79 | 1 |
| 173 | SMC | 2 | 1 | 14 | 3 | 3 | 5 | 0 | 1 | 70 | 0 |
| 174 | SMC | 4 | 1 | 14 | 2 | 2 | 2 | 1 | 1 | 56 | 1 |
| 175 | SMC | 4 | 1 | 16 | 3 | 1 | 3 | 0 | 1 | 54 | 1 |
| 176 | SMC | 4 | 1 | 18 | 3 | 3 | 3 | 0 | 1 | 60 | 0 |
| 177 | SMC | 1 | 1 | 22 | 3 | 1 | 3 | 0 | 2 | 74 | 1 |
| 178 | SMC | 2 | 0 | 24 | 1 | 0 | 5 | 0 | 2 | 79 | 1 |
| 179 | SMC | 1 | 1 | 8  | 1 | 3 | 3 | 0 | 1 | 34 | 1 |
| 180 | SMC | 1 | 1 | 9  | 3 | 3 | 4 | 0 | 1 | 59 | 0 |
| 181 | SMC | 4 | 1 | 25 | 1 | 1 | 3 | 0 | 1 | 78 | 1 |
| 182 | SMC | 1 | 0 | 8  | 2 | 3 | 5 | 0 | 1 | 69 | 0 |
| 183 | SMC | 2 | 0 | 9  | 0 | 3 | 2 | 1 | 1 | 78 | 1 |
| 184 | SMC | 4 | 1 | 12 | 3 | 3 | 3 | 0 | 2 | 73 | 0 |
| 185 | SMC | 2 | 1 | 18 | 3 | 1 | 3 | 0 | 1 | 22 | 0 |
| 186 | SMC | 1 | 1 | 18 | 0 | 3 | 5 | 0 | 1 | 89 | 1 |
| 187 | SMC | 4 | 1 | 13 | 1 | 4 | 5 | 0 | 2 | 47 | 0 |
| 188 | SMC | 4 | 1 | 6  | 3 | 4 | 3 | 0 | 1 | 63 | 0 |
| 189 | SMC | 4 | 1 | 11 | 2 | 0 | 5 | 0 | 1 | 69 | 0 |
| 190 | SMC | 4 | 1 | 23 | 3 | 1 | 1 | 0 | 1 | 71 | 0 |
| 191 | SMC | 2 | 1 | 25 | 3 | 0 | 1 | 0 | 1 | 78 | 0 |
| 192 | SMC | 1 | 0 | 20 | 0 | 3 | 2 | 1 | 1 | 34 | 0 |
| 193 | SMC | 1 | 1 |    | 2 | 4 | 3 | 0 | 2 | 74 | 1 |
| 194 | SMC | 1 | 1 | 13 | 1 | 2 | 3 | 0 | 2 | 70 | 1 |
| 195 | SMC | 4 | 0 | 12 | 0 | 0 | 2 | 1 | 2 | 64 | 0 |
| 196 | SMC |   | 0 | 15 | 1 | 2 | 3 | 0 | 2 | 69 | 1 |
| 197 | SMC | 1 | 1 | 18 | 2 | 3 | 3 | 0 | 1 | 73 | 1 |
| 198 | SMC | 1 | 1 | 19 | 0 | 0 | 5 | 0 | 2 | 77 | 1 |
| 199 | SMC | 4 | 1 | 18 | 2 | 2 | 2 | 1 | 1 | 74 | 1 |
| 200 | SMC | 1 | 1 |    | 2 | 2 | 5 | 0 | 1 | 82 | 1 |
| 201 | SMC | 4 | 0 | 15 | 2 | 1 | 5 | 0 | 2 | 62 | 0 |
| 202 | SMC | 1 | 1 | 19 | 0 | 0 | 1 | 0 | 1 | 86 | 1 |
| 203 | SMC | 1 | 1 | 21 | 0 | 0 | 1 | 0 | 1 | 74 | 1 |
| 204 | SMC | 4 | 1 | 16 | 3 | 1 | 1 | 0 | 1 | 54 | 0 |
| 205 | SMC | 4 | 0 | 19 | 2 | 0 | 3 | 0 | 1 | 70 | 0 |
| 206 | SMC | 4 | 1 | 7  | 3 | 4 | 1 | 0 | 1 | 54 | 0 |
| 207 | SMC | 1 | 0 | 11 | 0 | 2 | 1 | 0 | 1 | 53 | 1 |

|     |     |   |   |    |   |   |   |   |   |    |   |
|-----|-----|---|---|----|---|---|---|---|---|----|---|
| 208 | SMC | 1 | 0 | 11 | 3 | 4 | 5 | 0 | 2 | 52 | 0 |
| 209 | SMC | 4 | 1 |    | 3 | 2 | 1 | 0 | 1 | 65 | 0 |
| 210 | SMC | 4 | 1 | 10 | 3 | 2 | 1 | 0 | 1 | 65 | 0 |
| 211 | SMC | 1 | 1 | 6  | 0 | 3 | 2 | 1 | 2 | 55 | 1 |
| 212 | SMC | 1 | 1 | 18 | 2 | 1 | 5 | 0 | 2 | 76 | 0 |
| 213 | SMC | 1 | 1 | 20 | 2 | 1 | 3 | 0 | 2 | 72 | 0 |
| 214 | SMC | 4 | 1 | 16 | 2 | 3 | 3 | 0 | 2 | 84 | 1 |
| 215 | SMC | 4 | 1 | 15 | 2 | 3 |   | 0 | 2 | 75 | 0 |
| 216 | SMC | 4 | 0 | 20 | 1 | 1 | 3 | 0 | 1 | 54 | 0 |
| 217 | SMC | 4 | 0 | 18 | 2 | 1 | 3 | 0 | 1 | 77 | 1 |
| 218 | SMC | 1 | 1 | 21 | 2 | 1 | 3 | 0 | 2 | 72 | 0 |
| 219 | SMC | 2 | 1 | 6  | 3 | 4 | 1 | 0 | 1 | 54 | 0 |
| 220 | SMC | 4 | 1 | 20 | 2 | 3 | 5 | 0 | 1 | 51 | 0 |
| 221 | SMC | 2 | 0 | 20 | 2 | 1 | 5 | 0 | 2 | 63 | 0 |
| 222 | SMC | 2 | 0 | 19 | 2 | 1 | 2 | 1 | 2 | 49 | 0 |
